# Supplementary material for: A reliable murine model of bone metastasis by injecting cancer cells through caudal arteries
Source: PubMed Central journal article supplement (PMC6065368; doi:10.1038/s41467-018-05366-3), 2018-07-30
Supplement: 41467_2018_5366_MOESM2_ESM.pdf [file 41467_2018_5366_MOESM2_ESM.pdf]

## **Description of Additional Supplementary Files**

File Name: Supplementary Movie 1

Description: Mouse being injected with NIR-II nanoparticles via CA

File Name: Supplementary Movie 2

Description: Mouse being injected with NIR-II nanoparticles via IV

File Name: Supplementary Movie 3

Description: CA injection of cancer cells into a mouse under anesthesia
